# Supplementary material for: Comprehensive Transcriptome Analysis Provides Evidence of Local Thermal Adaptation in Three Loaches (Genus: Misgurnus)
Source: MDPI journal article supplement (doi:10.3390/ijms17121943), 2016-11-24
Supplement: s1 [file s1]

# Supplementary Materials: Comprehensive Transcriptome Analysis Provides Evidence of Local Thermal Adaptation in Three Loaches (Genus: *Misgurnus*)

Shaokui Yi, Sai Wang, Jia Zhong and Weimin Wang

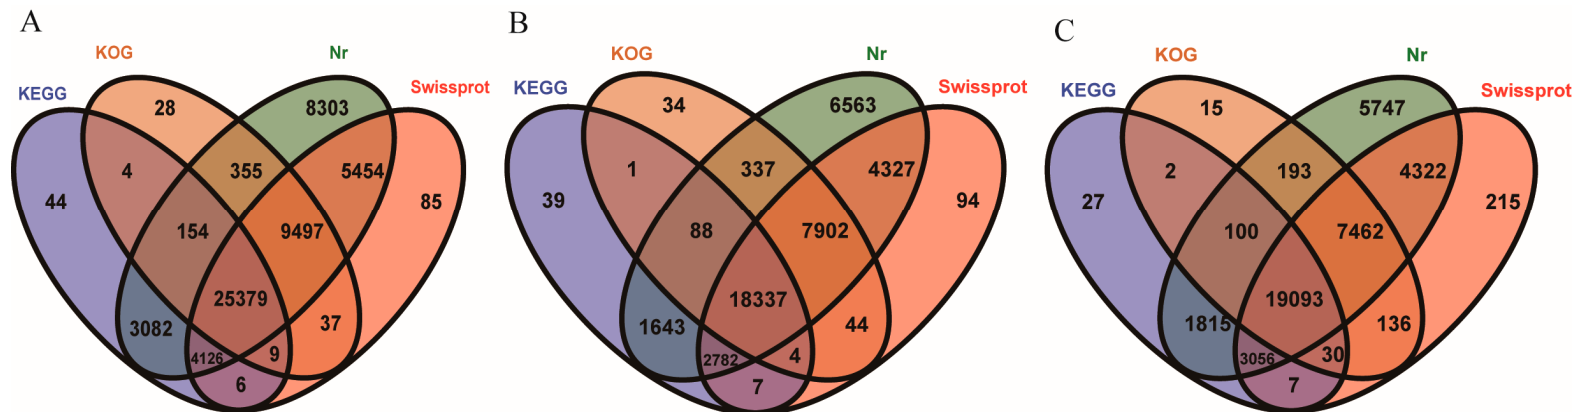

**Figure S1.** The summary of unigene annotations from four public protein databases in three loaches. (A) *M. anguillicaudatus*; (B) *M. bipartitus*; (C) *M. mohoity*.

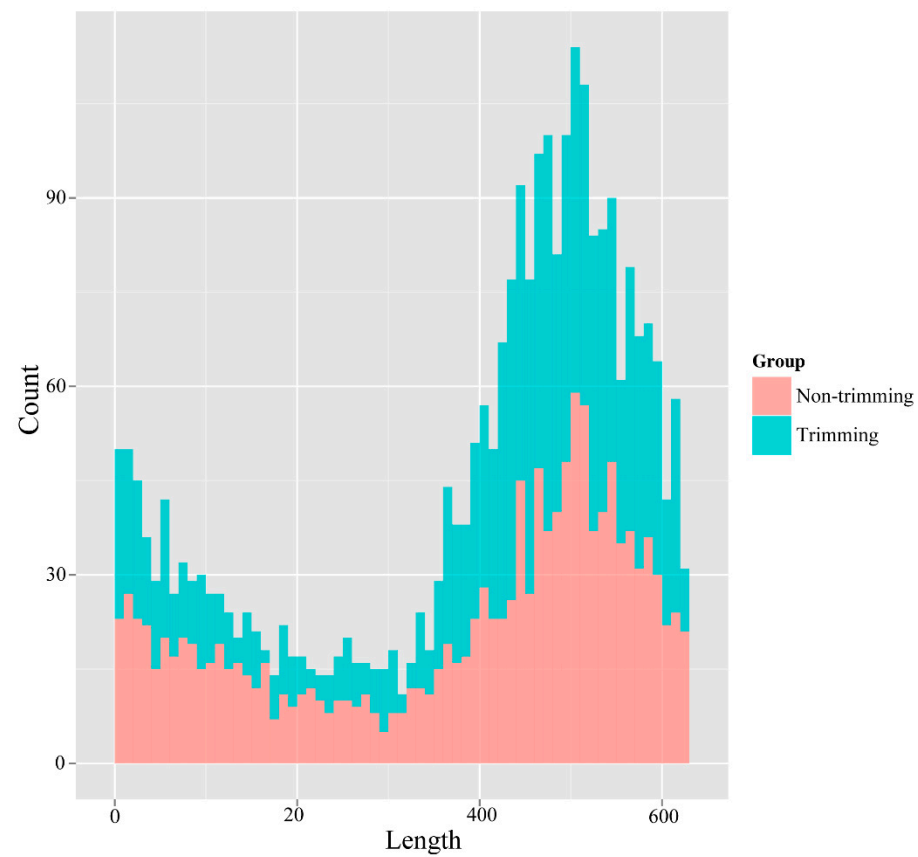

**Figure S2.** The distribution of alignments length before trimming and after trimming of 1392 orthologous genes in *Misgurnus* species.
